# Supplementary material
Source: publisher site journal article supplement (https://www.dovepress.com/article/294989)
Supplement: Supplementary file 1 [file get_supplementary_file.php]

Supplementary Figure [1]-The flowchart of deduplicate process of the isolates

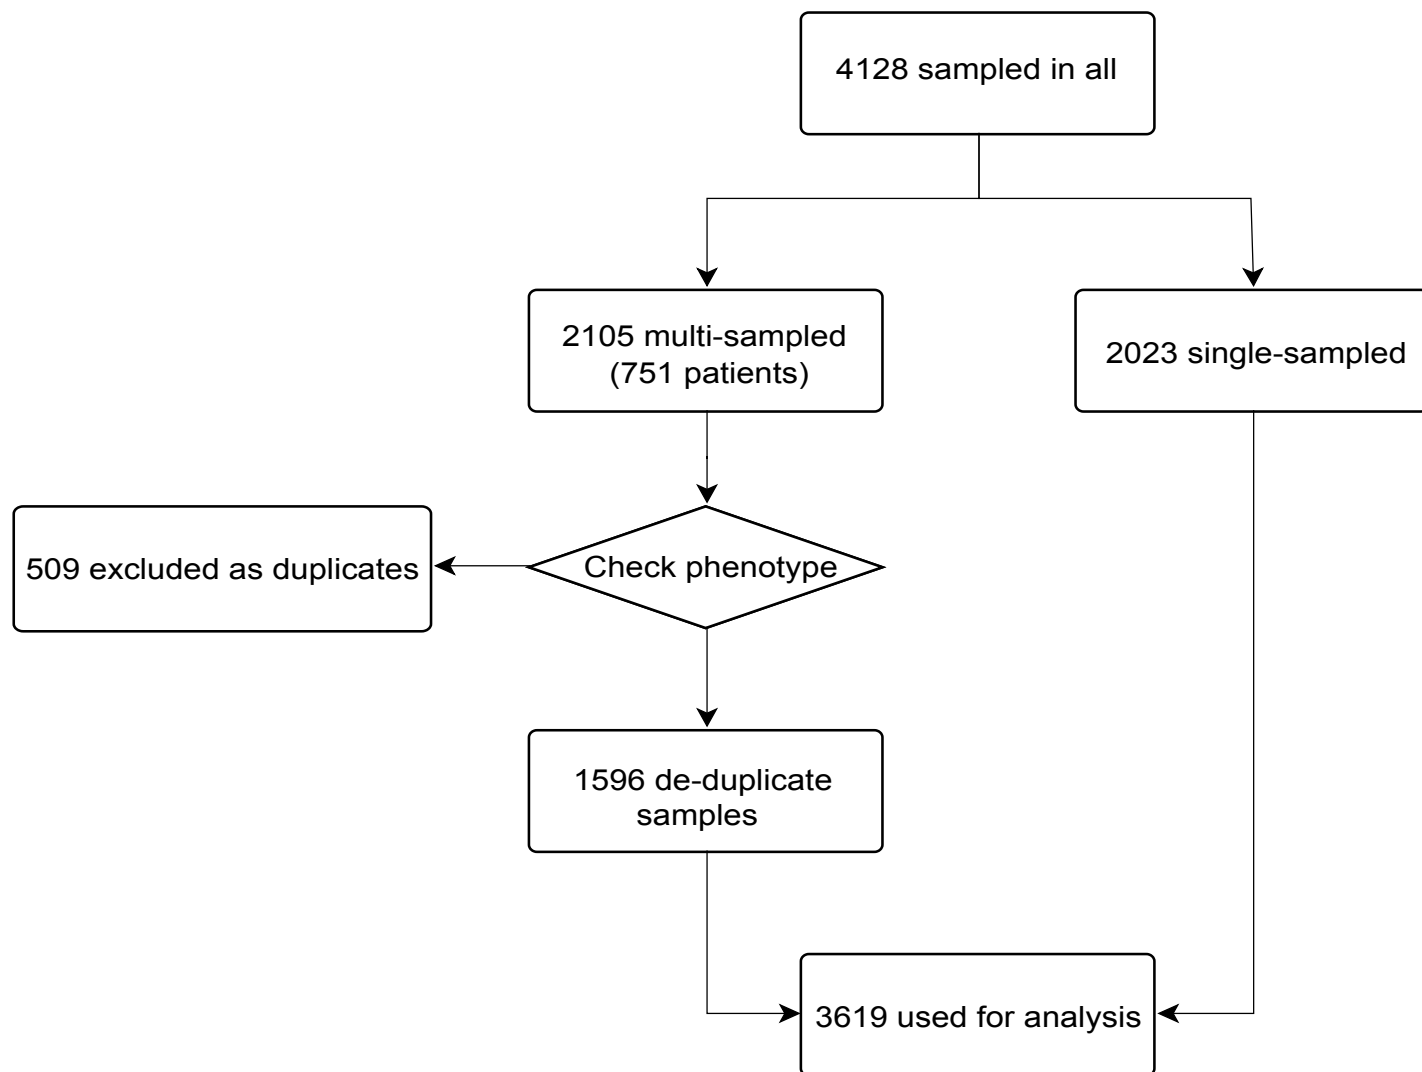

Supplementary table [1]-The category of antimicrobial agents in our study

| Antimicrobial category                                                        | Antimicrobial agent |
|-------------------------------------------------------------------------------|---------------------|
| Antipseudomonal penicillins + $\beta$ - lactamase inhibitors                  | TZP                 |
| Penicillins + $\beta$ - lactamase inhibitors                                  | AMC                 |
|                                                                               | SAM                 |
| Carbapenems                                                                   | ETP                 |
|                                                                               | IPM                 |
| Monobactams                                                                   | ATM                 |
| Penicillins                                                                   | AMP                 |
| Non - extended spectrum cephalosporins; 1st and 2nd generation cephalosporins | CFZ                 |
|                                                                               | CXM                 |
| Extended - spectrum cephalosporins; 3rd and 4th generation cephalosporins     | CAZ                 |
|                                                                               | CRO                 |
|                                                                               | CFP                 |
|                                                                               | FEP                 |
| Cephameycins                                                                  | CTT                 |
|                                                                               | FOX                 |
| Aminoglycosides                                                               | AK                  |
|                                                                               | GEN                 |
|                                                                               | TOB                 |
| Fluoroquinolones                                                              | CIP                 |
|                                                                               | LVX                 |
| Tetracyclines                                                                 | MIN                 |
| Nitrofurantoin                                                                | NIT                 |
| Folate pathway inhibitors                                                     | SXT                 |
| Glycylcyclines                                                                | TGC                 |
